# Supplementary material for: Removal Characteristics of N-Nitrosamines and Their Precursors by Pilot-Scale Integrated Membrane Systems for Water Reuse
Source: MDPI journal article supplement (doi:10.3390/ijerph15091960), 2018-09-07
Supplement: s1 [file s1]

# Removal Characteristics of *N*-nitrosamines and Their Precursors by Pilot-scale Integrated Membrane Systems for Water Reuse

Haruka Takeuchi \*, Naoyuki Yamashita, Norihide Nakada and Hiroaki Tanaka

**Table S1.** Limit of detection (LOD) and limit of quantification (LOQ) for eight *N*-Nitrosamines.

|            | NDMA | NMEA | NPYR | NDEA | NPIP | NMOR | NDPA | NDBA |
|------------|------|------|------|------|------|------|------|------|
| LOD (ng/L) | 0.1  | 0.4  | 0.4  | 1.0  | 0.5  | 1.0  | 0.9  | 0.9  |
| LOQ (ng/L) | 0.4  | 1.3  | 1.3  | 3.2  | 1.5  | 3.3  | 2.9  | 2.9  |

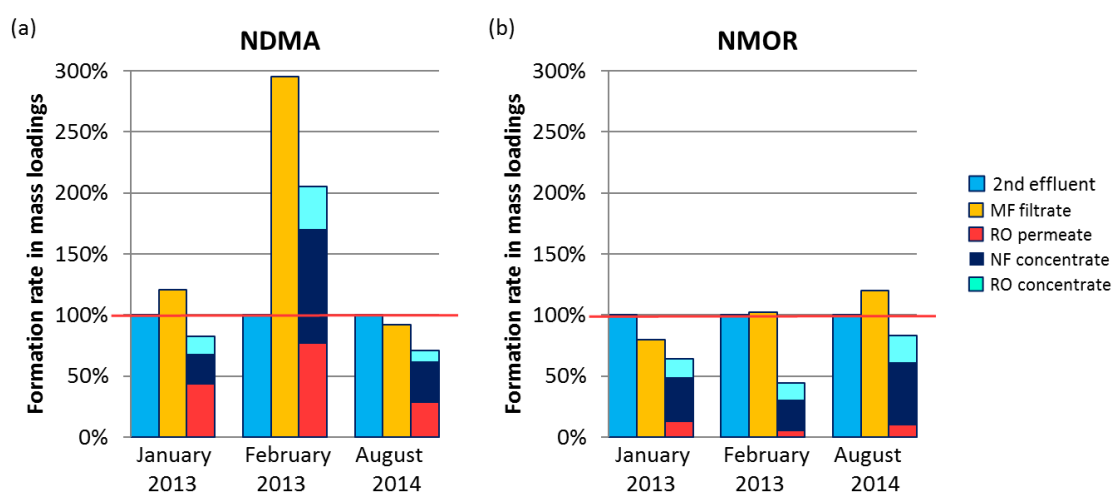

**Figure S1.** Formation rates of (a) NDMA and (b) NMOR across the membrane treatment at plant A.
